# Supplementary material for: Trends towards an improved disease state in rheumatoid arthritis over time: influence of new therapies and changes in management approach: analysis of the EMECAR cohort
Source: PubMed Central journal article supplement (PMC2656242; doi:10.1186/ar2561), 2008-11-26
Supplement: ar2561-S2.pdf [file ar2561-S2.pdf]

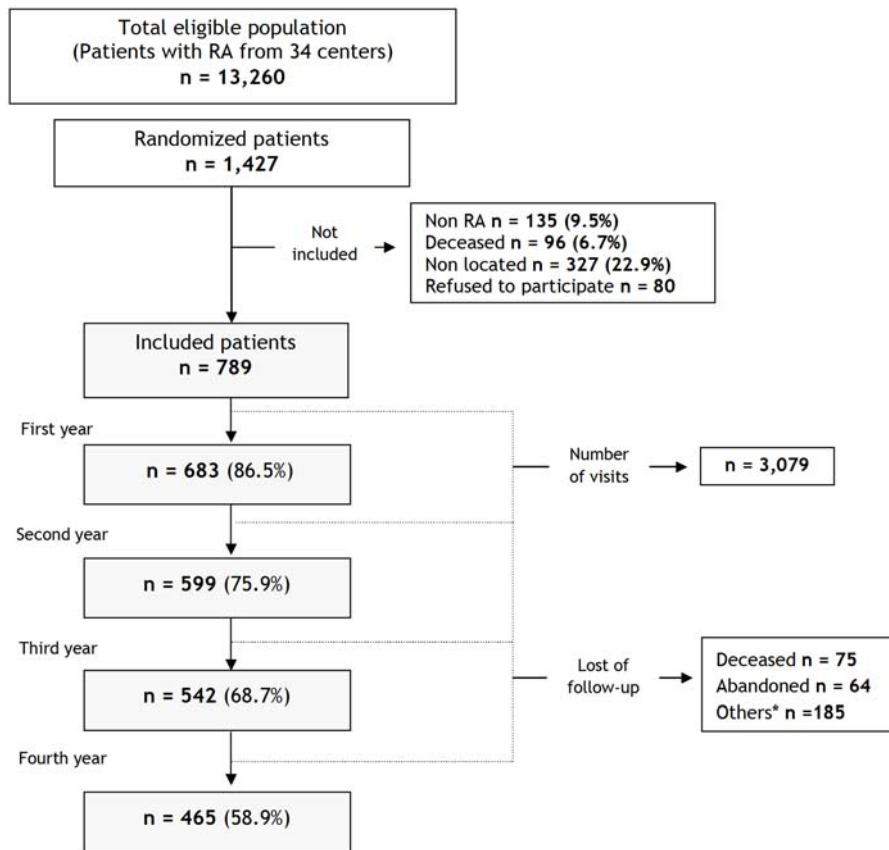

\* Other reasons include: One center was closed during the study (n=10); 48 patients changed address or could not be located by their physicians despite repeated calls; due to a national rearrangement of specialists, some centers refused to continue in the study because the original investigator had left the center (n = 127).
